# Supplementary material
Source: ML conference proceedings conference paper supplement (https://openaccess.thecvf.com/content/CVPR2024/html/Wang_EFormer_Enhanced_Transformer_CVPR_2024_paper.html)

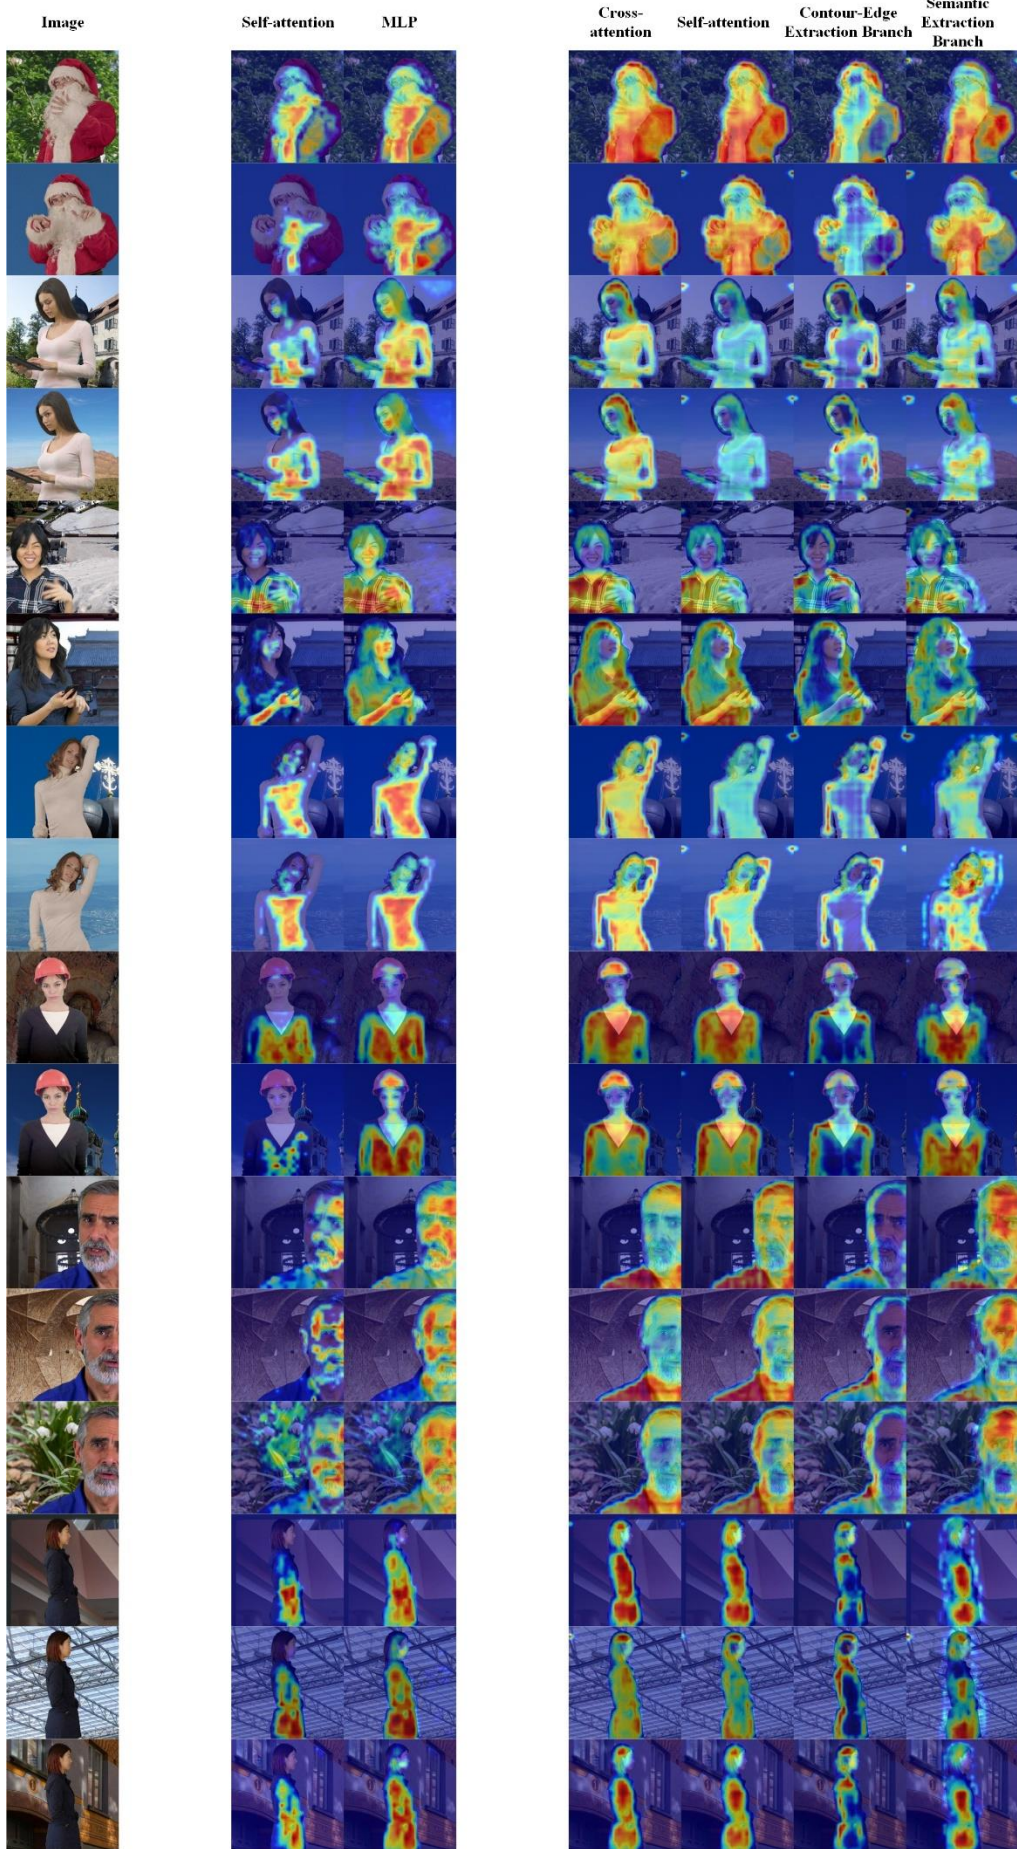

Supplement: Supplementary file 1 [file Wang_EFormer_Enhanced_Transformer_CVPR_2024_supplemental.pdf]
